# Supplementary material for: Cortical maturation in children with cochlear implants: Correlation between electrophysiological and behavioral measurement
Source: PubMed Central journal article supplement (PMC5289550; doi:10.1371/journal.pone.0171177), 2017-02-02
Supplement: pone.0171177.s001.pdf [file pone.0171177.s001.pdf]

| Subject | Hearing Children |                | Children with CI |                |                |                |                |                |                 |
|---------|------------------|----------------|------------------|----------------|----------------|----------------|----------------|----------------|-----------------|
|         | P1 latency (ms)  |                | P1 latency (ms)  |                | IT-MAIS        |                | MUSS           |                | Auditory Skills |
|         | 1st evaluation   | 2nd evaluation | 1st evaluation   | 2nd evaluation | 1st evaluation | 2nd evaluation | 1st evaluation | 2nd evaluation | 2nd evaluation  |
| 1       | 114              | 114            | 234              | 195            | 7,5            | 60             | 7,5            | 25             | Detection       |
| 2       | 139              | 129            | 220              | 121            | 70             | 87,5           | 30             | 52,5           | Discrimination  |
| 3       | 132              | 132            | 172              | 141            | 22             | 45             | 17,5           | 32,5           | Detection       |
| 4       | 140              | 124            | 186              | 170            | 37,5           | 87,5           | 47,5           | 45             | Detection       |
| 5       | 126              | 121            | 290              | 268            | 35             | 55             | 32,5           | 45             | Detection       |
| 6       | 117              | 116            | 232              | 172            | 87,5           | 92,5           | 57,5           | 82,5           | Discrimination  |
| 7       | 118              | 111            | 269              | 126            | 87,5           | 100            | 50             | 67,5           | Discrimination  |
| 8       | 113              | 113            | 138              | 113            | 95             | 100            | 92,5           | 97,5           | Comprehension   |
| 9       | 123              | 122            | 253              | 181            | 30             | 45             | 35             | 47,5           | Detection       |
| 10      | 118              | 118            | 297              | 170            | 60             | 70             | 35             | 65             | Detection       |
| 11      | 117              | 116            | 245              | 156            | 12,5           | 80             | 0              | 30             | Detection       |
| 12      | 118              | 118            | 242              | 130            | 97,5           | 100            | 80             | 92,5           | Discrimination  |
| 13      | 124              | 123            | 207              | 134            | 95             | 97,5           | 67,5           | 87,5           | Discrimination  |
| 14      | 114              | 113            | 234              | 182            | 42,5           | 77,5           | 45             | 62,5           | Detection       |
| 15      | 115              | 114            | 236              | 109            | 90             | 100            | 45             | 55             | Discrimination  |
